# Supplementary material
Source: Copernicus journal article supplement (doi:10.5194/egusphere-2026-261)
Supplement: Supplementary file 1 [file egusphere-2026-261-supplement.pdf]

Table S1. Fitted parameters of the exponential deposition model for each wind-speed-size combination.

| Wind speed<br>(m s <sup>-1</sup> ) | Particle size<br>(μm) | <i>a</i><br>(mg·cm <sup>-2</sup> ) | <i>k</i> (h <sup>-1</sup> ) | <i>τ</i> (h) | <i>J</i> <sub>0</sub><br>(mg·cm <sup>-2</sup> ·h <sup>-1</sup> ) | 95% CI of<br><i>J</i> <sub>0</sub> |
|------------------------------------|-----------------------|------------------------------------|-----------------------------|--------------|------------------------------------------------------------------|------------------------------------|
| 0                                  | 2.5                   | 95                                 | 0.24                        | 4.180        | 22.7                                                             | [16.9, 28.5]                       |
| 0                                  | 10                    | 386                                | 0.71                        | 1.400        | 275                                                              | [192, 359]                         |
| 0                                  | 20                    | 598                                | 0.90                        | 1.110        | 540                                                              | [398, 681]                         |
| 0                                  | 30                    | 728                                | 1.02                        | 0.978        | 744                                                              | [588, 900]                         |
| 0                                  | 40                    | 760                                | 1.24                        | 0.807        | 942                                                              | [718, 1165]                        |
| 0                                  | 63                    | 755                                | 1.52                        | 0.656        | 1151                                                             | [842, 1460]                        |
| 2                                  | 2.5                   | 73                                 | 3.03                        | 0.330        | 222                                                              | [162, 282]                         |
| 2                                  | 10                    | 349                                | 3.34                        | 0.300        | 1163                                                             | [521, 1806]                        |
| 2                                  | 20                    | 563                                | 2.35                        | 0.426        | 1321                                                             | [724, 1918]                        |
| 2                                  | 30                    | 649                                | 2.16                        | 0.463        | 1401                                                             | [543, 2260]                        |
| 2                                  | 40                    | 630                                | 2.46                        | 0.407        | 1546                                                             | [361, 2732]                        |
| 2                                  | 63                    | 640                                | 2.33                        | 0.430        | 1490                                                             | [411, 2569]                        |
| 4                                  | 2.5                   | 38                                 | 4.03                        | 0.248        | 153                                                              | [102, 205]                         |
| 4                                  | 10                    | 286                                | 2.96                        | 0.338        | 847                                                              | [715, 978]                         |
| 4                                  | 20                    | 399                                | 2.52                        | 0.397        | 1005                                                             | [819, 1192]                        |
| 4                                  | 30                    | 471                                | 2.68                        | 0.373        | 1264                                                             | [1138, 1391]                       |
| 4                                  | 40                    | 496                                | 3.53                        | 0.283        | 1751                                                             | [1422, 2080]                       |
| 4                                  | 63                    | 538                                | 3.66                        | 0.274        | 1966                                                             | [1811, 2122]                       |
| 6                                  | 2.5                   | 3                                  | 3.61                        | 0.277        | 11.5                                                             | [7.13, 15.9]                       |
| 6                                  | 10                    | 47                                 | 2.68                        | 0.373        | 126                                                              | [87.6, 164]                        |
| 6                                  | 20                    | 120                                | 3.62                        | 0.276        | 434                                                              | [160, 709]                         |
| 6                                  | 30                    | 250                                | 1.82                        | 0.550        | 456                                                              | [265, 647]                         |
| 6                                  | 40                    | 819                                | 0.91                        | 1.100        | 746                                                              | [474, 1018]                        |
| 6                                  | 63                    | 756                                | 1.63                        | 0.612        | 1234                                                             | [868, 1600]                        |

Table S2. Quadratic vertex of the  $J_0-U$  relationship and statistical support for non-monotonicity for each size class.

| Particle size ( $\mu\text{m}$ ) | $U_{opt}$ ( $\text{m s}^{-1}$ ) | 95% CI of $U_{opt}$ | LRT $p$ -value | $\Delta\text{AIC}$ (linear vs quadratic) |
|---------------------------------|---------------------------------|---------------------|----------------|------------------------------------------|
| 2.5                             | 2.88                            | [2.31, 3.34]        | 0.159          | 9.20                                     |
| 10                              | 2.81                            | [2.33, 3.21]        | 0.139          | 10.20                                    |
| 20                              | 2.81                            | [2.15, 3.33]        | 0.173          | 8.53                                     |
| 30                              | 2.73                            | [2.66, 2.79]        | 0.024          | 24.20                                    |
| 40                              | 2.90                            | [2.44, 3.31]        | 0.141          | 10.10                                    |
| 63                              | 3.27                            | [1.86, 6.13]        | 0.326          | 3.71                                     |

Table S3 Deviation from a strictly monotonic wind-speed benchmark, expressed as  $R(U) = J_0/J_{0,mono}$ .

| Particle size ( $\mu\text{m}$ ) | $R(2 \text{ m s}^{-1})$ | $R(4 \text{ m s}^{-1})$ | $R(6 \text{ m s}^{-1})$ |
|---------------------------------|-------------------------|-------------------------|-------------------------|
| 2.5                             | 1.723                   | 1.188                   | 0.089                   |
| 10                              | 1.633                   | 1.190                   | 0.177                   |
| 20                              | 1.436                   | 1.092                   | 0.472                   |
| 30                              | 1.347                   | 1.215                   | 0.438                   |
| 40                              | 1.147                   | 1.299                   | 0.554                   |
| 63                              | 1.000                   | 1.229                   | 0.771                   |

$J_0$  is the initial deposition flux derived from the kinetic fit ( $J_0 = ak$ ).

$R > 1$  indicates underprediction and  $R < 1$  indicates overprediction by a strictly monotonic scheme at that wind speed.
